# Supplementary material for: 2,3-Ethylene-bridged dihomooxacalix[4]arenes: synthesis, X-ray crystal structures and highly selective binding properties with anions
Source: Royal Society of Chemistry journal article supplement (doi:10.1039/c8nj01284a), 2018-01-01
Supplement: c8nj01284a1.pdf [file c8nj01284a1.pdf]

## Electronic Supplementary Information

### **2,3-ethylene-bridged Dihomooxalix[4]arenes: synthesis, X-ray crystal structures and highly selective binding properties with anions**

Lin An<sup>a\*, b, c</sup>, Jia-wei Wang<sup>b, c</sup>, Chan Wang<sup>b, c</sup>, Shan-shan Zhou<sup>b, c</sup>, Jing Sun<sup>a</sup>, Chao-Guo Yan<sup>a\*</sup>

*a. College of Chemistry & Chemical Engineering, Yangzhou University, Yangzhou 225002, P. R. China*

*b. College of Pharmacy, Xuzhou Medical University, Xuzhou 221004, P. R. China*

*c. Jiangsu Key Laboratory of New Drug Research and Clinical Pharmacy, Xuzhou Medical University, Xuzhou 221004, P. R. China*

The supporting information provides the UV-Vis and fluorescent spectrum, <sup>1</sup>H NMR, <sup>13</sup>C NMR, HRMS spectra and crystal data of compounds **3a-3c** in the manuscript. All compounds were dissolved in CDCl<sub>3</sub> or DMSO-*d*<sub>6</sub> and the <sup>1</sup>H and <sup>13</sup>C NMR spectra were recorded at 400 MHz on a Bruker AV-400 spectrometer. HRMS data were obtained using a (UHR-TOF) maXis 4G instrument. Absorption spectra were recorded on a UV-3100 PC UV-Vis-NIR spectrophotometer. The Fluorescence data was determined by the Fluorescence spectroscopy measurements performed on an F-4600 spectrophotometer (Varian) equipped with a xenon discharge lamp using a 1cm quartz cell. The single crystal of **3a-3c** were determined on Bruker Smart Apex X-single crystal diffractometer and were refined by full-matrix least-squares on F2 with SHELXS-97.

# $^1\text{H}$ NMR, $^{13}\text{C}$ NMR and HRMS spectra of 3a

## $^1\text{H}$ NMR (400MHz, DMSO- $d_6$ )

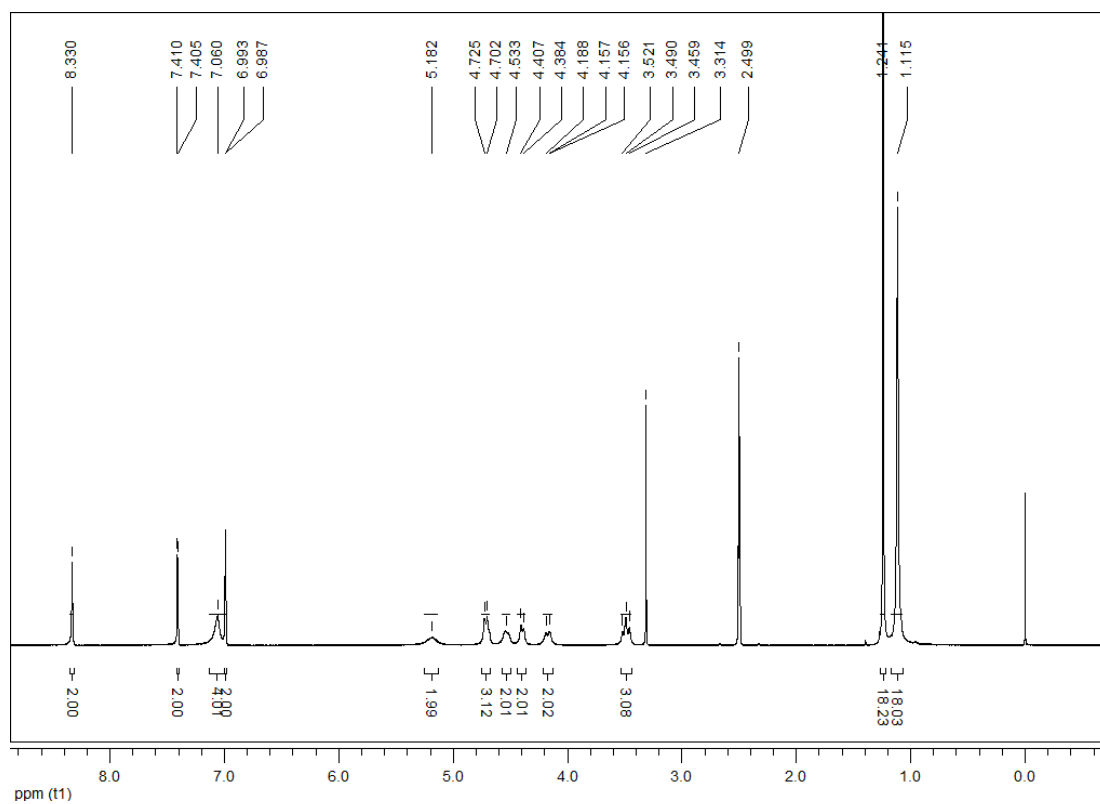

## $^{13}\text{C}$ NMR (100MHz, CDCl $_3$ )

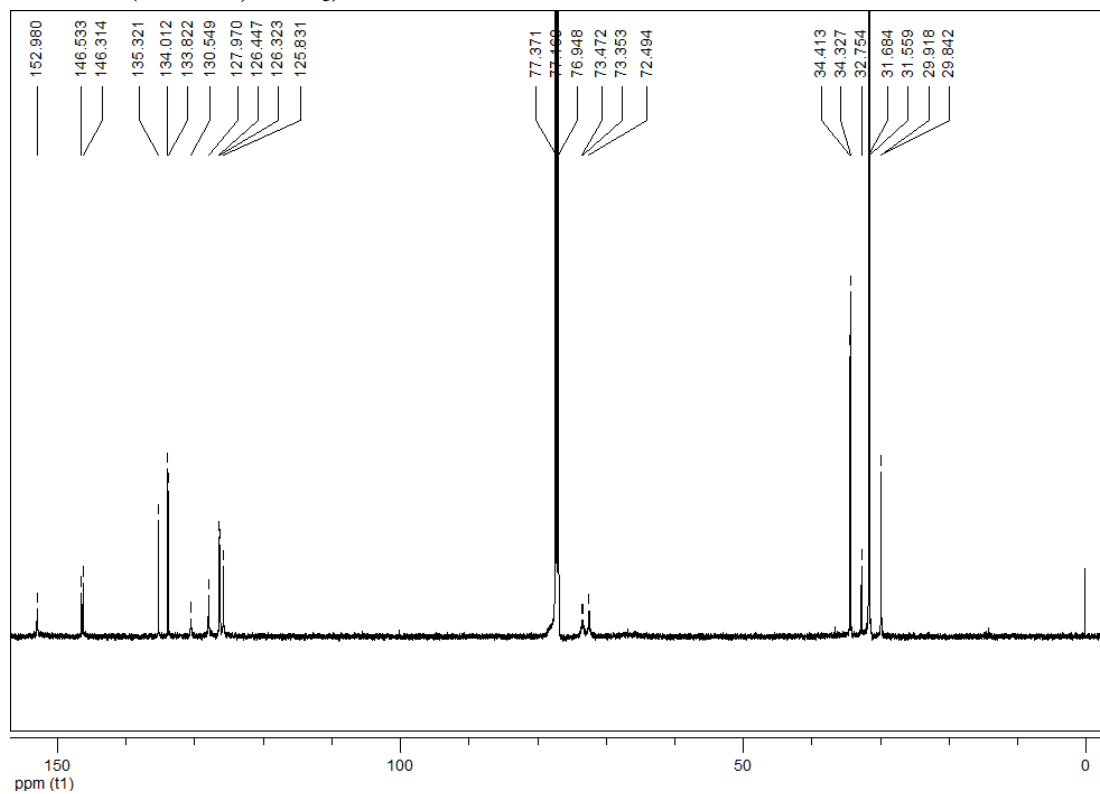

## HRMS

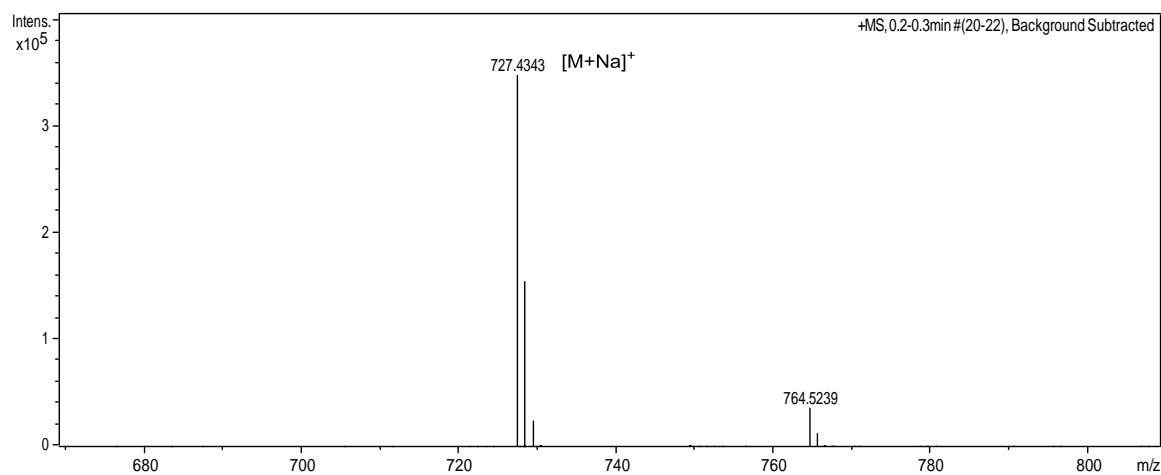

## <sup>1</sup>H NMR, <sup>13</sup>C NMR and HRMS spectra of 3b

### <sup>1</sup>H NMR (400MHz, DMSO-d<sub>6</sub>)

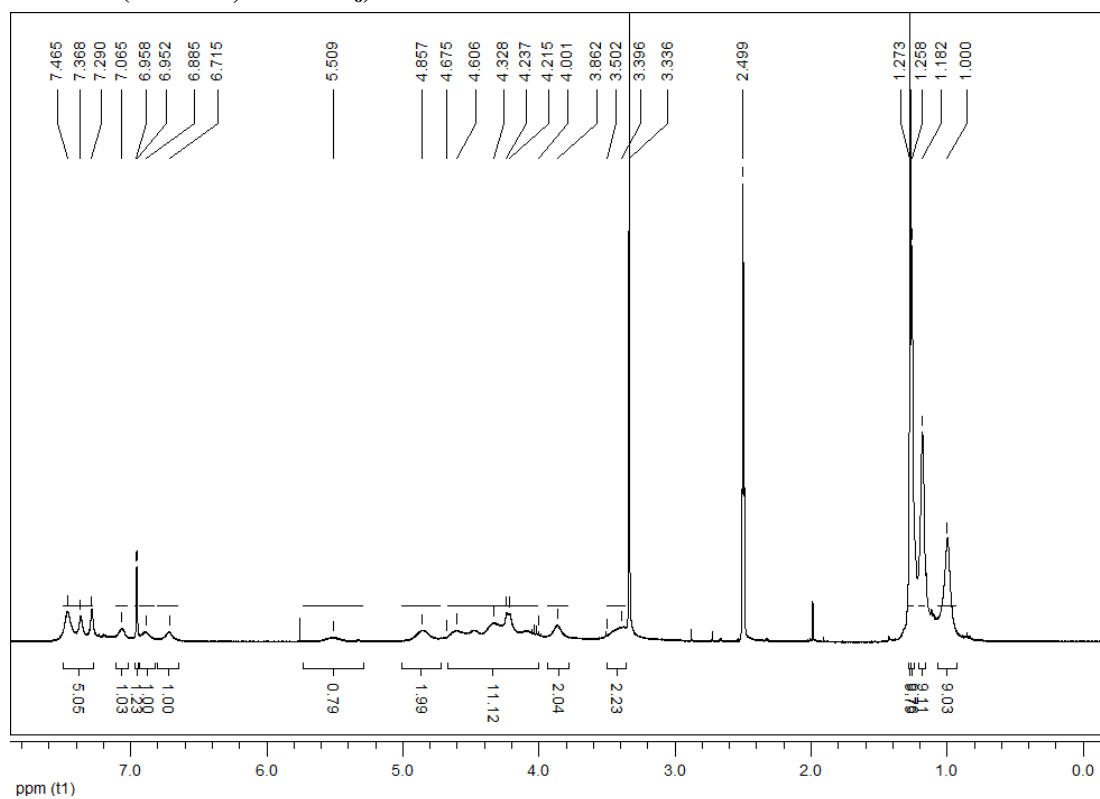

**$^{13}\text{C}$  NMR (100MHz,  $\text{CDCl}_3$ )**

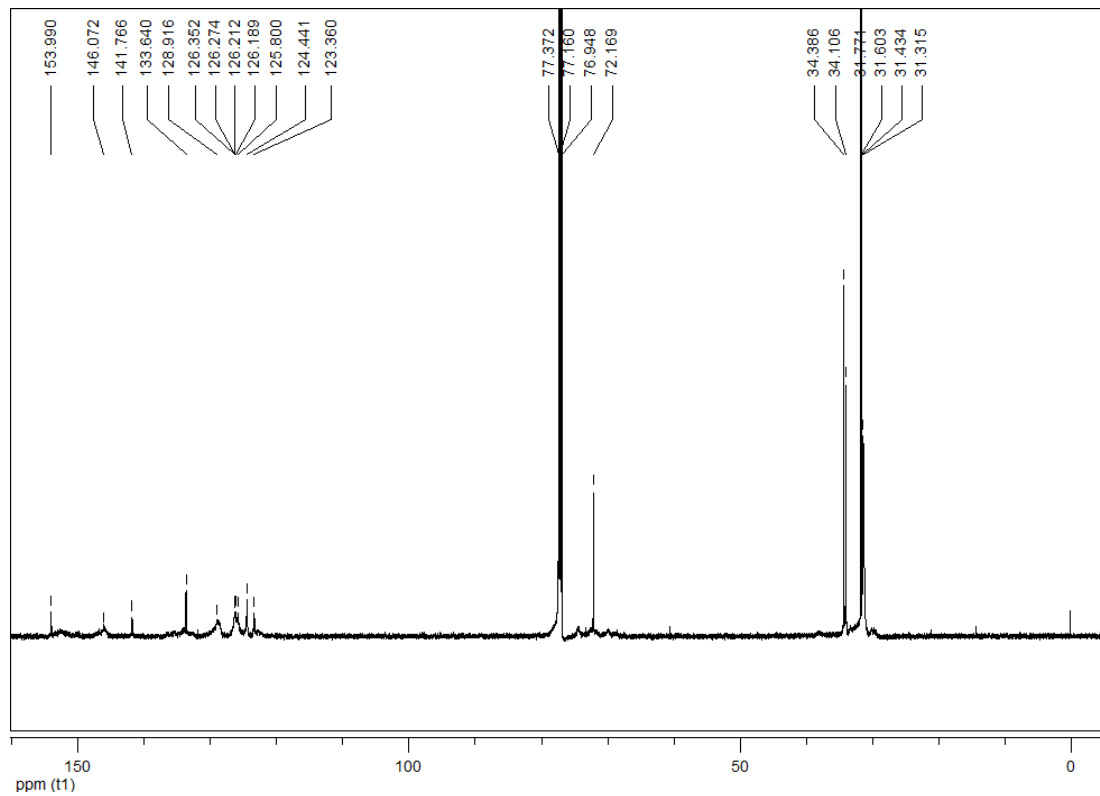

**HRMS**

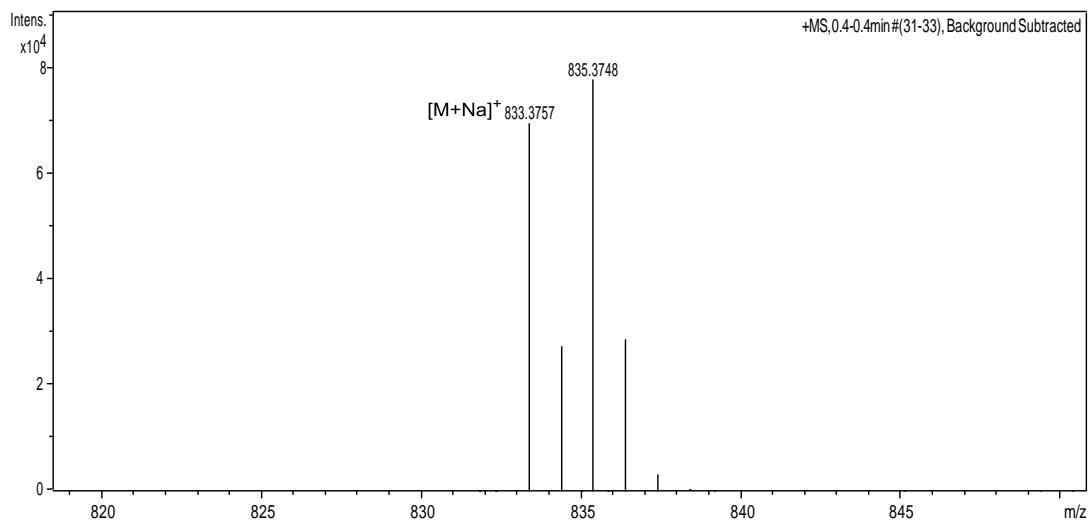

# $^1\text{H}$ NMR, $^{13}\text{C}$ NMR and HRMS spectra of compound 3c

## $^1\text{H}$ NMR (400MHz, $\text{CDCl}_3$ )

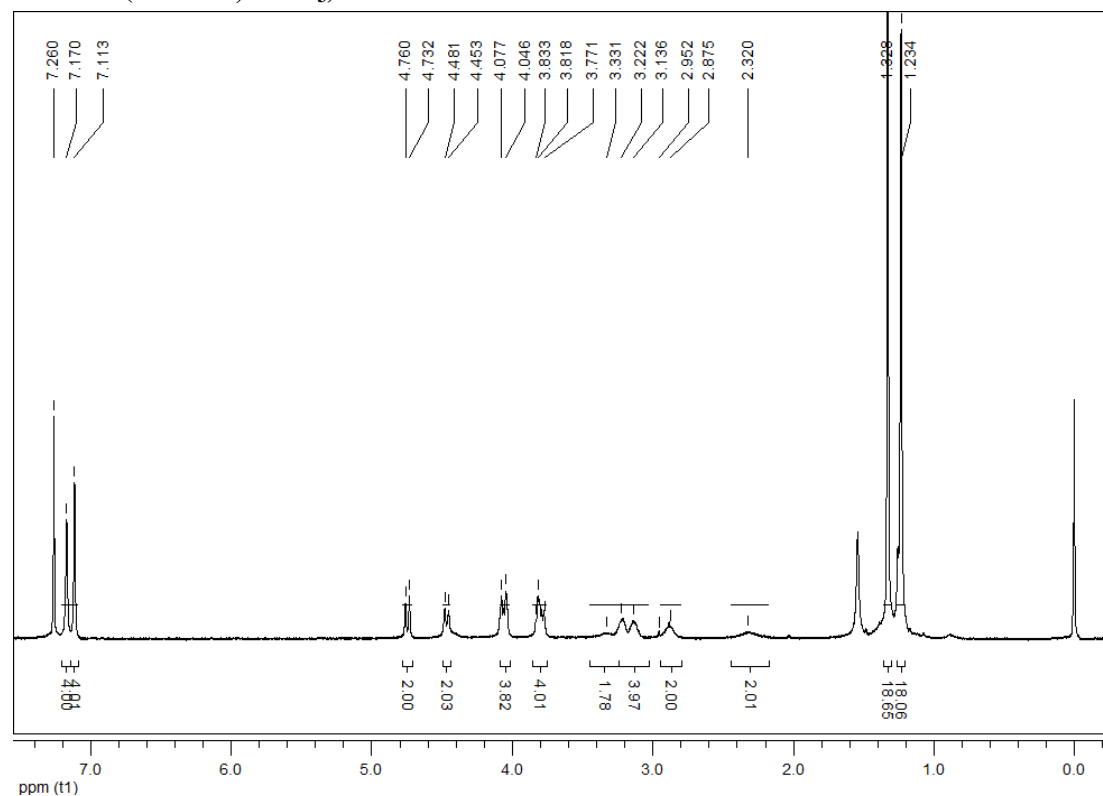

## $^{13}\text{C}$ NMR (100MHz, $\text{CDCl}_3$ )

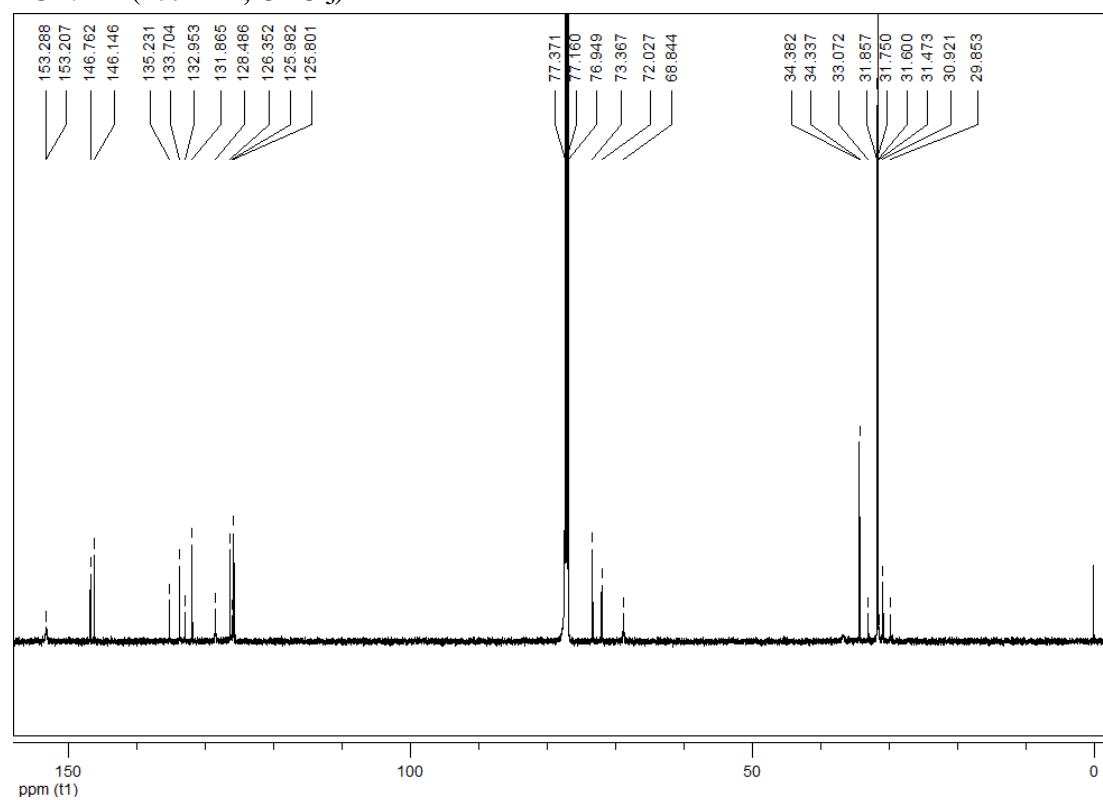

**HRMS**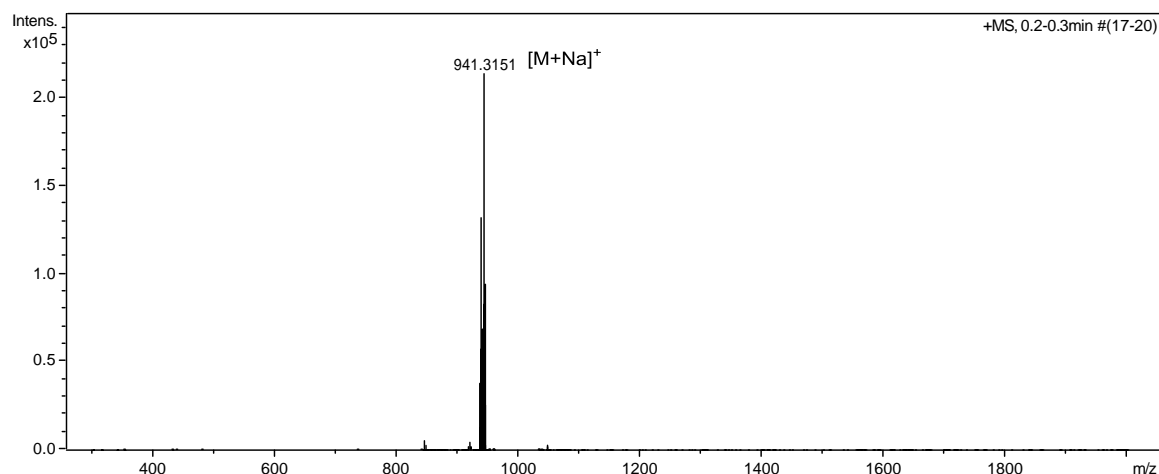**Table S1 the crystal data of 3a**

| <b>Compound</b>                            | <b>3a</b>                                                     |
|--------------------------------------------|---------------------------------------------------------------|
| Empirical Formula                          | C <sub>47</sub> H <sub>60</sub> O <sub>5</sub>                |
| Formula weight                             | 704.95                                                        |
| Temperature (K)                            | 293(2)                                                        |
| Wavelength (Å)                             | 0.71073                                                       |
| Crystal system, space group                | Monoclinic, C2/c                                              |
| <i>a</i> (Å)                               | 32.262(4)                                                     |
| <i>b</i> (Å)                               | 14.764(2)                                                     |
| <i>c</i> (Å)                               | 19.644(3)                                                     |
| $\alpha$ (deg)                             | 90                                                            |
| $\beta$ (deg)                              | 114.967(4)                                                    |
| $\gamma$ (deg)                             | 90                                                            |
| <i>V</i> (Å <sup>3</sup> )                 | 8483(2)                                                       |
| Z, Calculated density (Mg/m <sup>3</sup> ) | 8, 1.104                                                      |
| Absorption coefficient (mm <sup>-1</sup> ) | 0.070                                                         |
| F(000)                                     | 3056                                                          |
| Crystal size (mm)                          | 0.26 x 0.24 x 0.22                                            |
| Theta range for data collection (deg)      | 1.739 to 27.598                                               |
| Limiting indices                           | -39<= <i>h</i> <=42, -19<= <i>k</i> <=19, -25<= <i>l</i> <=25 |
| Reflections collected / unique             | 32930 / 9717 [R(int) = 0.0864]                                |
| Completeness to theta = 25.00              | 98.9%                                                         |
| Absorption correction                      | Semi-empirical from equivalents                               |
| Max. and min. transmission                 | 0.985 and 0.982                                               |

|                                                                 |                                    |
|-----------------------------------------------------------------|------------------------------------|
| Refinement method                                               | Full-matrix least-squares on $F^2$ |
| Data / restraints / parameters                                  | 9717 / 24 / 515                    |
| GOF on $F^2$                                                    | 1.056                              |
| Final R indices [ $I > 2\sigma(I)$ ] $R_1$ [ $I > 2\sigma(I)$ ] | $R_1 = 0.1678$ , $wR_2 = 0.3999$   |
| R indices (all data)                                            | $R_1 = 0.1994$ , $wR_2 = 0.4145$   |
| Largest diff. peak and hole ( $e/\text{\AA}^3$ )                | 0.837, -0.792                      |

**Table S2 The crystal data of 3b**

| Compound                                    | 3b                                                                 |
|---------------------------------------------|--------------------------------------------------------------------|
| Empirical Formula                           | $C_{49}H_{63}BrO_5$                                                |
| Formula weight                              | 811.90                                                             |
| Temperature (K)                             | 293(2)                                                             |
| Wavelength ( $\text{\AA}$ )                 | 0.71073                                                            |
| Crystal system, space group                 | P -1, Triclinic                                                    |
| $a$ ( $\text{\AA}$ )                        | 11.294(3)                                                          |
| $b$ ( $\text{\AA}$ )                        | 13.330(3)                                                          |
| $c$ ( $\text{\AA}$ )                        | 15.319(4)                                                          |
| $\alpha$ (deg)                              | 80.401(7)                                                          |
| $\beta$ (deg)                               | 89.620(9)                                                          |
| $\gamma$ (deg)                              | 82.038(9)                                                          |
| $V$ ( $\text{\AA}^3$ )                      | 2251.7(10)                                                         |
| Z, Calculated density ( $\text{Mg/m}^3$ )   | 2, 1.197                                                           |
| Absorption coefficient ( $\text{mm}^{-1}$ ) | 0.956                                                              |
| F(000)                                      | 864                                                                |
| Crystal size (mm)                           | 0.38 x 0.34 x 0.32                                                 |
| Theta range for data collection (deg)       | 1.821 to 24.998                                                    |
| Limiting indices                            | $-13 \leq h \leq 13$ , $-15 \leq k \leq 15$ , $-17 \leq l \leq 18$ |
| Reflections collected / unique              | 25207 / 7763 [ $R(\text{int}) = 0.2251$ ]                          |
| Completeness to theta = 25.00               | 98.0                                                               |
| Absorption correction                       | Semi-empirical from equivalents                                    |
| Max. and min. transmission                  | 0.736, 0.702                                                       |
| Refinement method                           | Full-matrix least-squares on $F^2$                                 |
| Data / restraints / parameters              | 7763 / 146 / 555                                                   |
| GOF on $F^2$                                | 1.057                                                              |

|                                                                 |                                  |
|-----------------------------------------------------------------|----------------------------------|
| Final R indices [ $I > 2\sigma(I)$ ] $R_1$ [ $I > 2\sigma(I)$ ] | $R_1 = 0.1281$ , $wR_2 = 0.2311$ |
| R indices (all data)                                            | $R_1 = 0.3615$ , $wR_2 = 0.3037$ |
| Largest diff. peak and hole ( $e/\text{\AA}^3$ )                | 0.426 and -0.472                 |

**Table S3 The crystal data of 3c**

| Compound                                                        | 3c                                                                 |
|-----------------------------------------------------------------|--------------------------------------------------------------------|
| Empirical Formula                                               | $C_{51}H_{66}Br_2O_5$                                              |
| Formula weight                                                  | 918.85                                                             |
| Temperature (K)                                                 | 296(2)                                                             |
| Wavelength ( $\text{\AA}$ )                                     | 0.71073                                                            |
| Crystal system, space group                                     | Orthorhombic, P b c n                                              |
| $a$ ( $\text{\AA}$ )                                            | 27.808(3)                                                          |
| $b$ ( $\text{\AA}$ )                                            | 17.183(2)                                                          |
| $c$ ( $\text{\AA}$ )                                            | 21.075(2)                                                          |
| $\alpha$ (deg)                                                  | 90                                                                 |
| $\beta$ (deg)                                                   | 90                                                                 |
| $\gamma$ (deg)                                                  | 90                                                                 |
| $V$ ( $\text{\AA}^3$ )                                          | 10070(2)                                                           |
| Z, Calculated density ( $\text{Mg/m}^3$ )                       | 8, 1.212                                                           |
| Absorption coefficient ( $\text{mm}^{-1}$ )                     | 1.652                                                              |
| F(000)                                                          | 3856                                                               |
| Crystal size (mm)                                               | 0.26 x 0.22 x 0.20                                                 |
| Theta range for data collection (deg)                           | 1.393 to 25.497                                                    |
| Limiting indices                                                | $-32 \leq h \leq 33$ , $-20 \leq k \leq 18$ , $-23 \leq l \leq 25$ |
| Reflections collected / unique                                  | 76689 / 9368 [ $R(\text{int}) = 0.079$ ]                           |
| Completeness to theta = 25.00                                   | 99.9%                                                              |
| Absorption correction                                           | Semi-empirical from equivalents                                    |
| Max. and min. transmission                                      | 0.719 and 0.657                                                    |
| Refinement method                                               | Full-matrix least-squares on $F^2$                                 |
| Data / restraints / parameters                                  | 9368 / 327 / 664                                                   |
| GOF on $F^2$                                                    | 1.024                                                              |
| Final R indices [ $I > 2\sigma(I)$ ] $R_1$ [ $I > 2\sigma(I)$ ] | $R_1 = 0.0538$ , $wR_2 = 0.1255$                                   |
| R indices (all data)                                            | $R_1 = 0.1222$ , $wR_2 = 0.1546$                                   |
| Largest diff. peak and hole ( $e/\text{\AA}^3$ )                | 0.337, -0.432                                                      |



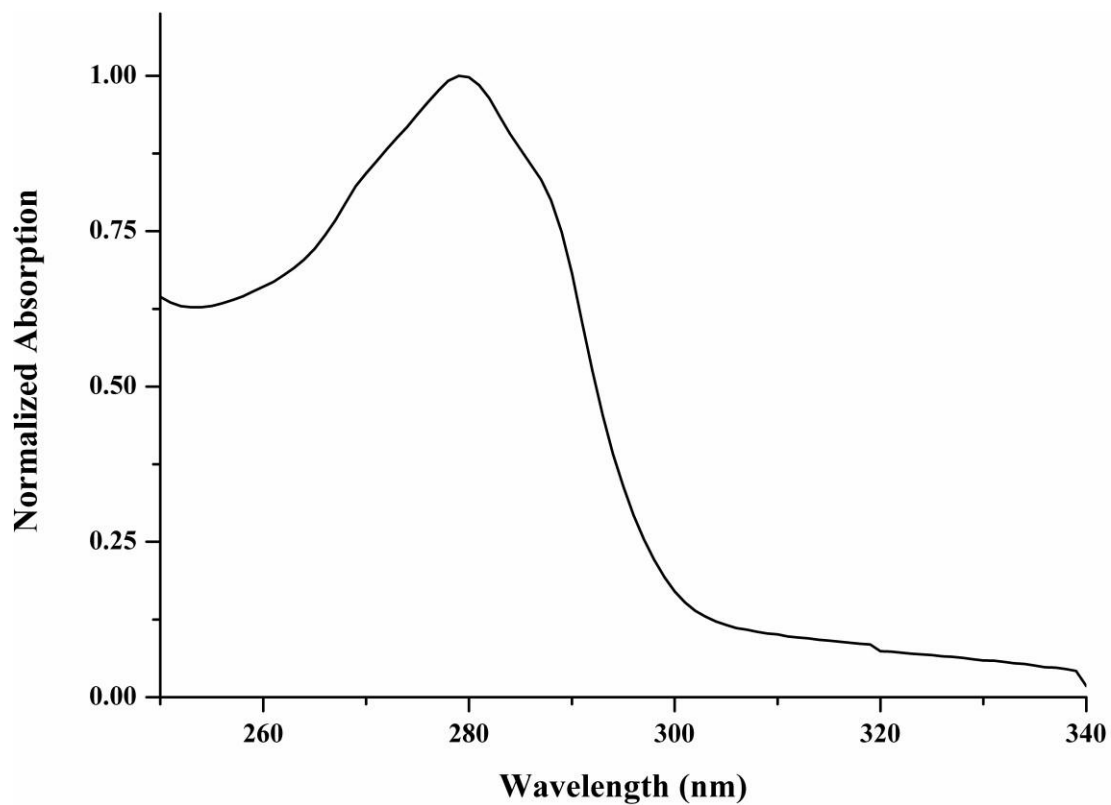

Fig. S1 Normalized absorption spectra of 3a (50  $\mu$ M)

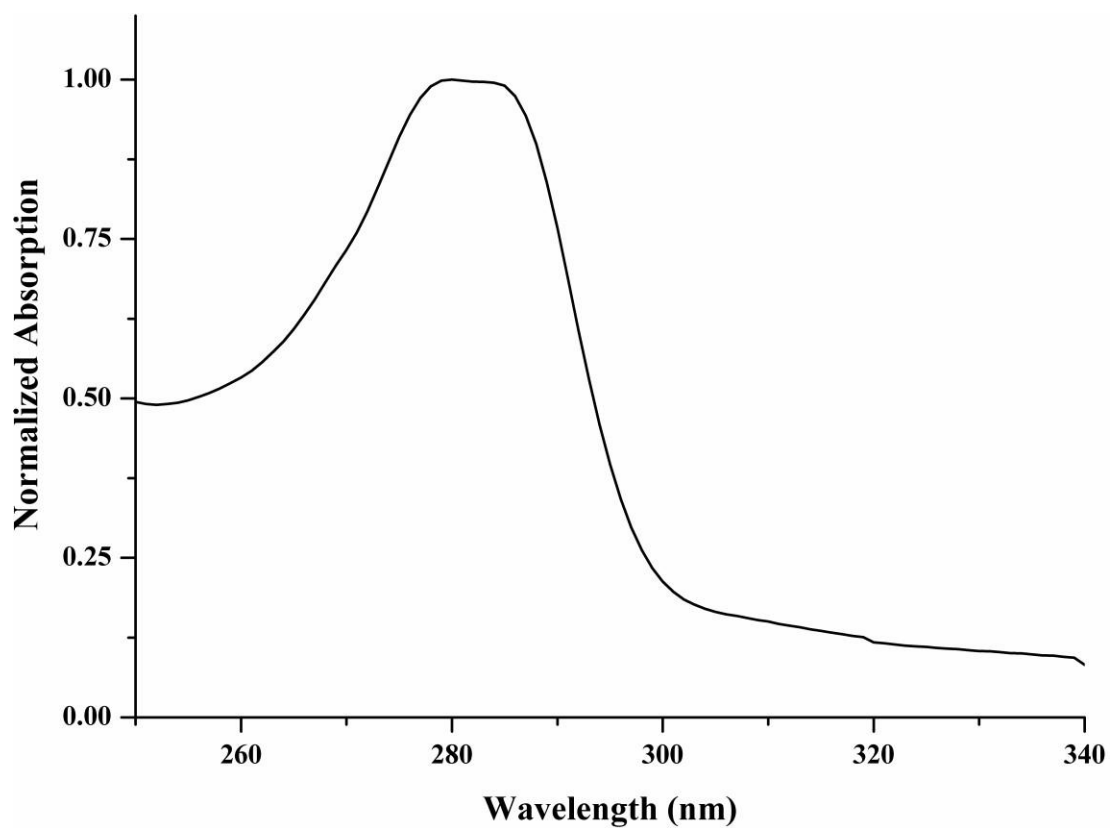

Fig. S2 Normalized absorption spectra of 1 (50  $\mu$ M)

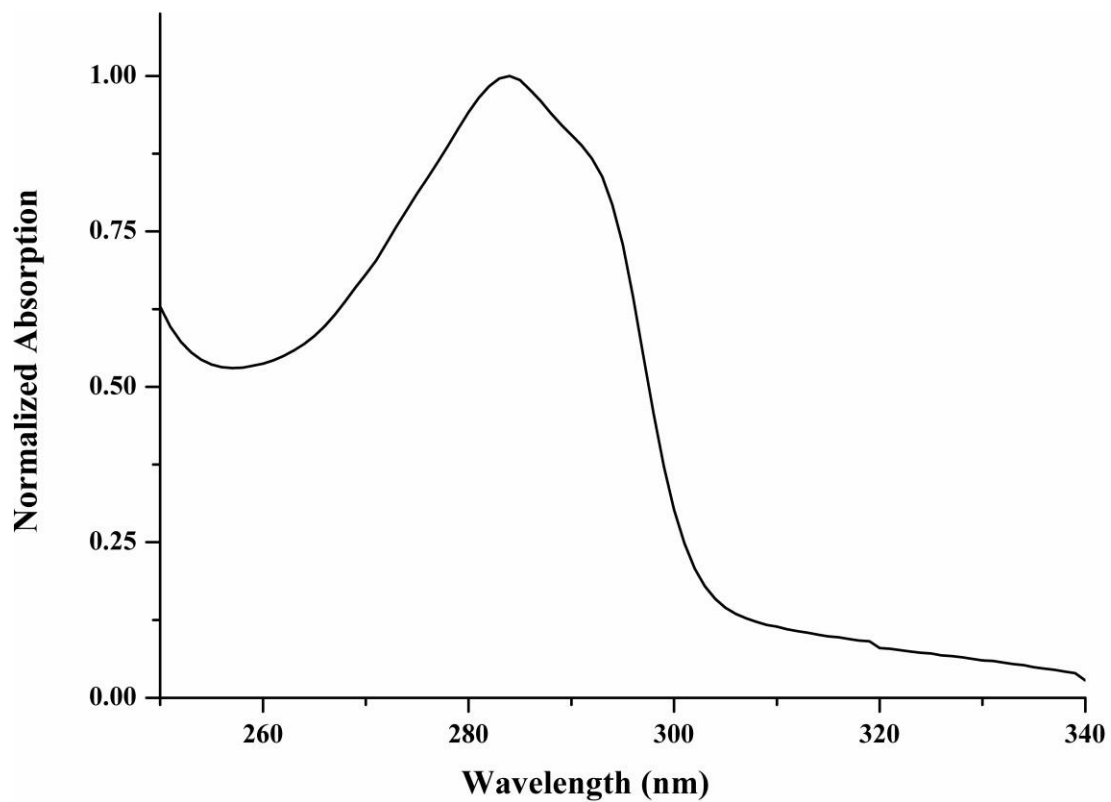

Fig. S3 Normalized absorption spectra of 4 (50 μM)

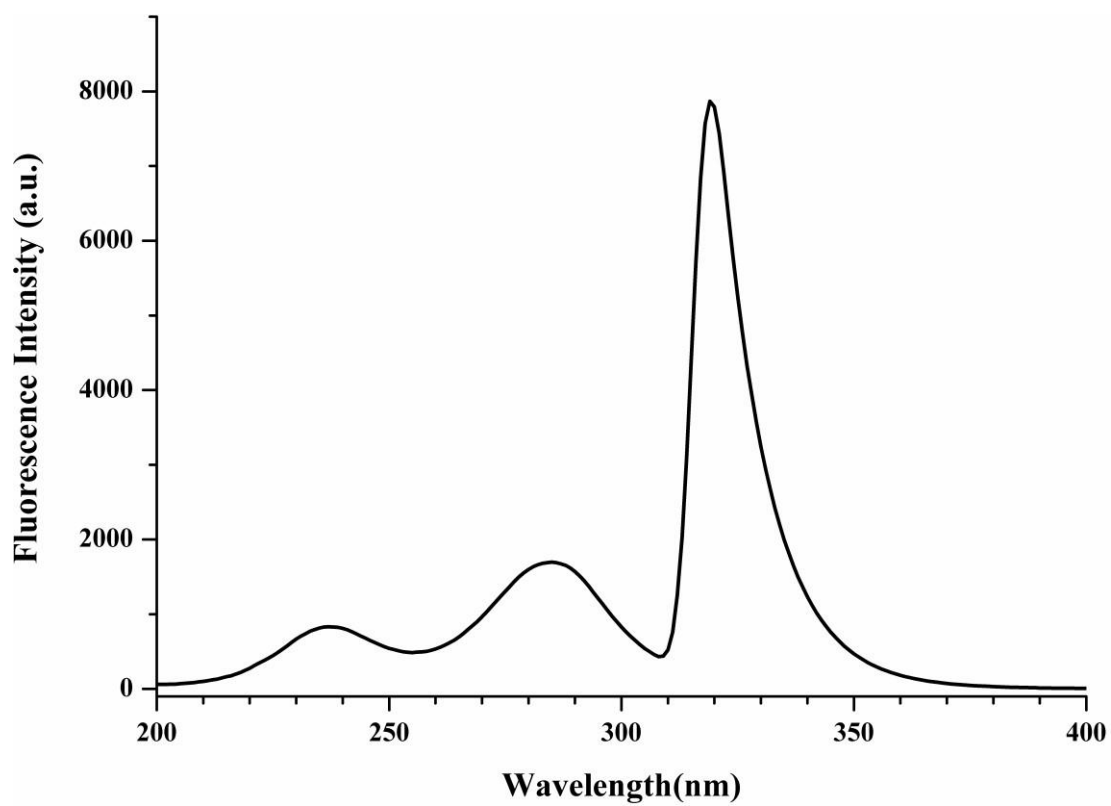

Fig. S4 The excitation spectra of 3a

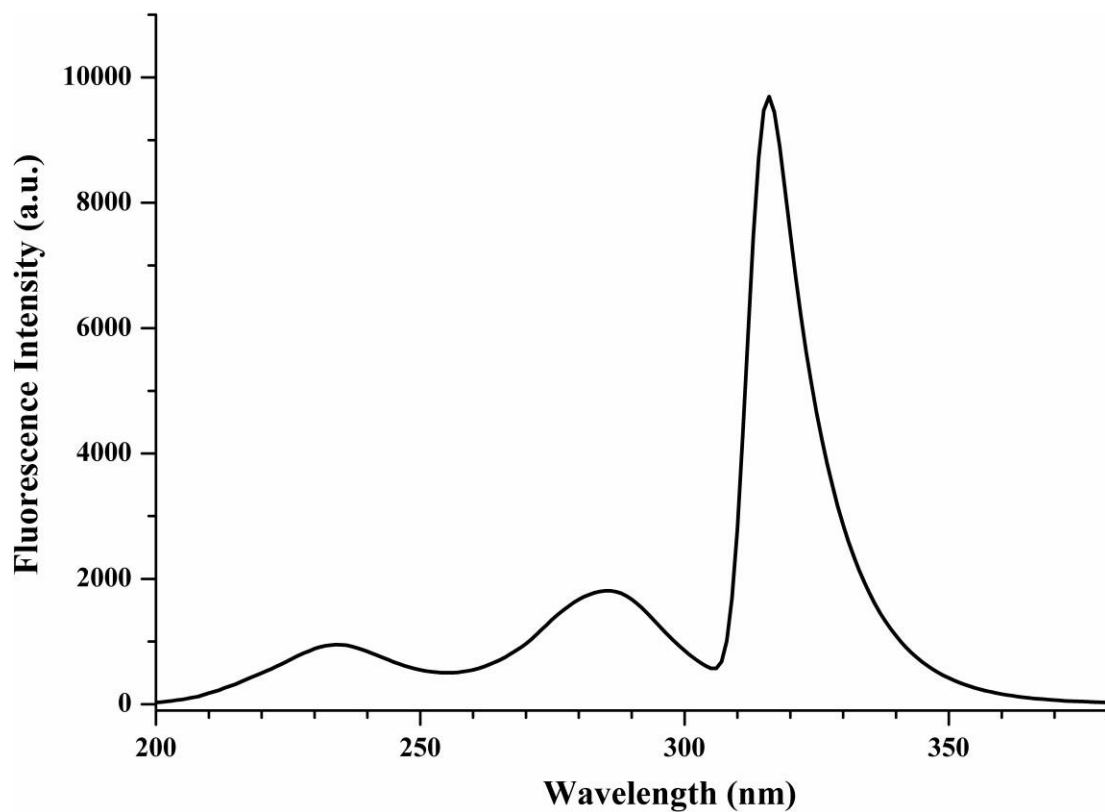

Fig. S5 The excitation spectra of 1

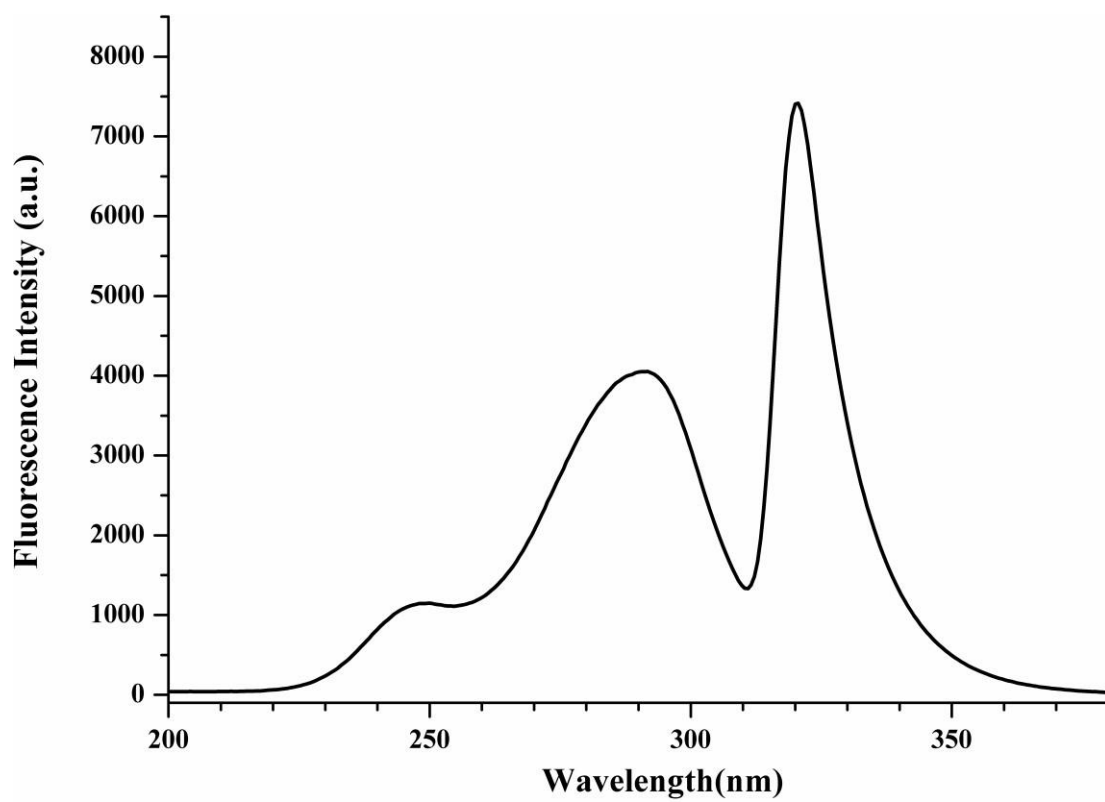

Fig. S6 The excitation spectra of 4
